# Supplementary material
Source: publisher figshare collection journal article supplement (https://karger.figshare.com/ndownloader/files/12015599)
Supplement: Supplementary file 1 [file 12015599]

## Supplementary data

**Table S1.** PD-L1 expression in tumor cells and tumor-infiltrating immune cells in paired HCC tissues before and after sorafenib treatment.

| IHC score <sup>a</sup>          | Before sorafenib | After sorafenib |
|---------------------------------|------------------|-----------------|
|                                 | (Tissue-1)       | (Tissue-2)      |
|                                 | N (%)            | N (%)           |
| Total                           | 23 (100.0)       | 23 (100.0)      |
| Tumor-infiltrating immune cells |                  |                 |
| 0                               | 11 (47.8)        | 5 (21.7)        |
| 1                               | 5 (21.7)         | 5 (21.7)        |
| 2                               | 5 (21.7)         | 2 (8.7)         |
| 3                               | 2 (8.7)          | 11 (47.8)       |
| Tumor cells                     |                  |                 |
| 0                               | 19 (82.6)        | 14 (60.7)       |
| 1                               | 2 (8.7)          | 5 (21.7)        |
| 2                               | 0 (0)            | 0 (0)           |
| 3                               | 2 (8.7)          | 4 (17.4)        |

<sup>a</sup>PD-L1 expression was scored as IHC 0, 1, 2, or 3 if <1%, ≥1% but <5%, ≥5% but <10%, or ≥10% of cells were PD-L1 positive, respectively. Abbreviations: IHC =

immunohistochemistry; HCC = hepatocellular carcinoma; PD-L1 = programmed death-ligand 1.
